# Supplementary material for: Dietary Habits Modify the Association of Physical Exercise with Cognitive Impairment in Community-Dwelling Older Adults
Source: MDPI journal article supplement (doi:10.3390/jcm11175122), 2022-08-30
Supplement: s1 [file s1]

**Table S1.** The associations between physical exercise and prevalent and incident cognitive impairment in total sample and stratified by dietary habits in older adults <80 years.

|                                     | No Physical Exercise |                                      | Physical Exercise |                                      | OR (95% CI) for the Association Between PE and CI Within Each Stratum of Dietary Habits |
|-------------------------------------|----------------------|--------------------------------------|-------------------|--------------------------------------|-----------------------------------------------------------------------------------------|
|                                     | N With/Without CI    | OR (95% CI)                          | N With/Without CI | OR (95% CI)                          |                                                                                         |
| Cross-sectional Analyses            |                      |                                      |                   |                                      |                                                                                         |
| Total Sample                        | 104/2240             | 1.0 (reference)                      | 39/1548           | 1.02 (0.62–1.69)<br><i>p</i> = 0.933 |                                                                                         |
| Don't Eat Fruits                    | 78/1354              | 1.0 (reference)                      | 27/712            | 1.25 (0.72–2.19)<br><i>p</i> = 0.431 | 1.30 (0.74–2.28)<br><i>p</i> = 0.370                                                    |
| Eat Fruits                          | 26/886               | 0.84 (0.46–1.54)<br><i>p</i> = 0.575 | 12/836            | 0.47 (0.18–1.20)<br><i>p</i> = 0.113 | 0.51 (0.15–1.77)<br><i>p</i> = 0.291                                                    |
| Don't Eat Vegetables                | 20/176               | 1.0 (reference)                      | 11/82             | 1.37 (0.52–3.58)<br><i>p</i> = 0.523 | 0.94 (0.30–2.96)<br><i>p</i> = 0.915                                                    |
| Eat Vegetables                      | 84/2064              | 0.48 (0.25–0.91)<br><i>p</i> = 0.026 | 28/1466           | 0.45 (0.20–0.98)<br><i>p</i> = 0.045 | 0.98 (0.54–1.76)<br><i>p</i> = 0.935                                                    |
| Don't Drink Tea                     | 68/1253              | 1.0 (reference)                      | 24/801            | 1.10 (0.58–2.08)<br><i>p</i> = 0.779 | 0.98 (0.51–1.91)<br><i>p</i> = 0.964                                                    |
| Drink Tea                           | 36/986               | 1.34 (0.77–2.33)<br><i>p</i> = 0.301 | 15/746            | 1.25 (0.58–2.68)<br><i>p</i> = 0.574 | 0.93 (0.40–2.18)<br><i>p</i> = 0.876                                                    |
| Don't Eat Meat                      | 54/788               | 1.0 (reference)                      | 16/428            | 0.89 (0.43–1.82)<br><i>p</i> = 0.745 | 0.69 (0.30–1.56)<br><i>p</i> = 0.367                                                    |
| Eat Meat                            | 50/1451              | 0.65 (0.37–1.15)<br><i>p</i> = 0.140 | 23/1119           | 0.75 (0.38–1.48)<br><i>p</i> = 0.406 | 1.12 (0.57–2.22)<br><i>p</i> = 0.739                                                    |
| Don't Eat Fish                      | 70/1354              | 1.0 (reference)                      | 26/749            | 1.12 (0.62–2.02)<br><i>p</i> = 0.710 | 1.12 (0.60–2.07)<br><i>p</i> = 0.727                                                    |
| Eat Fish                            | 34/885               | 1.36 (0.75–2.49)<br><i>p</i> = 0.310 | 13/798            | 1.16 (0.50–2.68)<br><i>p</i> = 0.729 | 1.01 (0.38–2.67)<br><i>p</i> = 0.985                                                    |
| Don't Eat Eggs                      | 42/795               | 1.0 (reference)                      | 15/394            | 1.02 (0.47–2.23)<br><i>p</i> = 0.954 | 1.01 (0.44–2.31)<br><i>p</i> = 0.976                                                    |
| Eat Eggs                            | 62/1444              | 1.01 (0.57–1.78)<br><i>p</i> = 0.972 | 24/1153           | 1.03 (0.51–2.10)<br><i>p</i> = 0.933 | 1.04 (0.53–2.03)<br><i>p</i> = 0.912                                                    |
| Don't Eat Food Made from Beans      | 59/1051              | 1.0 (reference)                      | 17/545            | 1.17 (0.59–2.30)<br><i>p</i> = 0.658 | 1.01 (0.49–2.10)<br><i>p</i> = 0.973                                                    |
| Eat Food Made from Beans            | 45/1188              | 0.95 (0.54–1.64)<br><i>p</i> = 0.842 | 22/1002           | 0.85 (0.41–1.74)<br><i>p</i> = 0.655 | 0.97 (0.47–2.03)<br><i>p</i> = 0.945                                                    |
| Don't Eat Salt-preserved Vegetables | 68/1235              | 1.0 (reference)                      | 22/896            | 1.08 (0.56–2.07)<br><i>p</i> = 0.821 | 1.09 (0.55–2.16)<br><i>p</i> = 0.797                                                    |
| Eat Salt-preserved Vegetables       | 36/1004              | 1.04 (0.61–1.78)<br><i>p</i> = 0.890 | 17/651            | 0.99 (0.49–2.02)<br><i>p</i> = 0.983 | 0.74 (0.32–1.71)<br><i>p</i> = 0.484                                                    |
| Don't Eat Sugar                     | 78/1601              | 1.0 (reference)                      | 26/1009           | 1.07 (0.60–1.91)<br><i>p</i> = 0.824 | 1.01 (0.55–1.85)<br><i>p</i> = 0.970                                                    |
| Eat Sugar                           | 26/638               | 1.11 (0.62–2.00)                     | 13/538            | 1.02 (0.46–2.27)                     | 1.44 (0.50–4.11)                                                                        |

|                              |          |                  |         |                  |                  |
|------------------------------|----------|------------------|---------|------------------|------------------|
|                              |          | $p = 0.727$      |         | $p = 0.958$      | $p = 0.499$      |
| Don't Eat Garlic             | 74/1230  | 1.0 (reference)  | 19/702  | 0.82 (0.42–1.58) | 0.68 (0.34–1.34) |
|                              |          |                  |         | $p = 0.549$      | $p = 0.266$      |
| Eat Garlic                   | 30/1009  | 0.80 (0.45–1.40) | 20/845  | 1.09 (0.56–2.15) | 2.19 (0.93–5.14) |
|                              |          | $p = 0.432$      |         | $p = 0.794$      | $p = 0.072$      |
| Don't Eat Milk Products      | 83/1847  | 1.0 (reference)  | 32/951  | 1.20 (0.70–2.06) | 1.15 (0.67–1.97) |
|                              |          |                  |         | $p = 0.496$      | $p = 0.620$      |
| Eat Milk Products            | 21/392   | 1.20 (0.57–2.53) | 7/596   | 0.57 (0.20–1.62) | 0.28 (0.04–2.02) |
|                              |          | $p = 0.635$      |         | $p = 0.290$      | $p = 0.205$      |
| Don't Eat Nut Products       | 101/1923 | 1.0 (reference)  | 36/1183 | 1.04 (0.63–1.73) | 1.03 (0.62–1.71) |
|                              |          |                  |         | $p = 0.873$      | $p = 0.921$      |
| Eat Nut Products             | 3/316    | 0.40 (0.09–1.75) | 3/363   | 0.24 (0.03–1.90) | -                |
|                              |          | $p = 0.224$      |         | $p = 0.177$      |                  |
| Don't Eat Mushroom or Algae  | 98/2021  | 1.0 (reference)  | 35/1184 | 1.02 (0.61–1.70) | 0.99 (0.59–1.65) |
|                              |          |                  |         | $p = 0.946$      | $p = 0.959$      |
| Eat Mushroom or Algae        | 6/217    | 0.71 (0.18–2.83) | 4/361   | 0.78 (0.17–3.62) | -                |
|                              |          | $p = 0.625$      |         | $p = 0.746$      |                  |
| Don't Eat Vitamins           | 98/2118  | 1.0 (reference)  | 39/1305 | 1.12 (0.67–1.85) | 1.11 (0.67–1.84) |
|                              |          |                  |         | $p = 0.670$      | $p = 0.697$      |
| Eat Vitamins                 | 6/121    | 1.40 (0.46–4.21) | 0/242   | -                | -                |
|                              |          | $p = 0.554$      |         |                  |                  |
| Don't Eat Medicinal Plants   | 102/2193 | 1.0 (reference)  | 38/1432 | 1.04 (0.63–1.72) | 1.03 (0.62–1.70) |
|                              |          |                  |         | $p = 0.870$      | $p = 0.913$      |
| Eat Medicinal Plants         | 2/46     | 0.71 (0.07–6.93) | 1/115   | -                | -                |
|                              |          | $p = 0.768$      |         |                  |                  |
| <b>Longitudinal Analyses</b> |          |                  |         |                  |                  |
| Total Sample                 | 106/1657 | 1.0 (reference)  | 44/1132 | 0.47 (0.28–0.81) |                  |
|                              |          |                  |         | $p = 0.007$      |                  |
| Don't Eat Fruits             | 71/995   | 1.0 (reference)  | 24/534  | 0.45 (0.23–0.89) | 0.45 (0.21–0.96) |
|                              |          |                  |         | $p = 0.021$      | $p = 0.038$      |
| Eat Fruits                   | 35/662   | 0.72 (0.40–1.27) | 20/598  | 0.37 (0.16–0.84) | 0.14 (0.04–0.51) |
|                              |          | $p = 0.251$      |         | $p = 0.018$      | $p = 0.003$      |
| Don't Eat Vegetables         | 10/125   | 1.0 (reference)  | 4/57    | 1.77 (0.26–11.9) | -                |
|                              |          |                  |         | $p = 0.557$      |                  |
| Eat Vegetables               | 96/1532  | 1.92 (0.60–6.13) | 40/1075 | 0.84 (0.24–2.91) | 0.43 (0.24–0.75) |
|                              |          | $p = 0.270$      |         | $p = 0.781$      | $p = 0.003$      |
| Don't Drink Tea              | 57/940   | 1.0 (reference)  | 22/599  | 0.40 (0.18–0.89) | 0.26 (0.09–0.74) |
|                              |          |                  |         | $p = 0.024$      | $p = 0.011$      |
| Drink Tea                    | 49/716   | 1.64 (0.92–2.91) | 22/532  | 0.90 (0.42–1.91) | 0.40 (0.18–0.92) |
|                              |          | $p = 0.092$      |         | $p = 0.779$      | $p = 0.031$      |
| Don't Eat Meat               | 34/579   | 1.0 (reference)  | 12/320  | 0.48 (0.18–1.31) | 0.44 (0.08–2.33) |
|                              |          |                  |         | $p = 0.152$      | $p = 0.338$      |
| Eat Meat                     | 72/1077  | 1.77 (0.94–3.34) | 32/811  | 0.83 (0.38–1.82) | 0.46 (0.24–0.89) |
|                              |          | $p = 0.079$      |         | $p = 0.645$      | $p = 0.022$      |

|                                         |          |                                      |         |                                      |                                      |
|-----------------------------------------|----------|--------------------------------------|---------|--------------------------------------|--------------------------------------|
| Don't Eat Fish                          | 73/1007  | 1.0 (reference)                      | 22/575  | 0.36 (0.17–0.75)<br><i>p</i> = 0.006 | 0.36 (0.16–0.84)<br><i>p</i> = 0.018 |
| Eat Fish                                | 33/649   | 1.15 (0.64–2.07)<br><i>p</i> = 0.630 | 22/556  | 0.78 (0.36–1.68)<br><i>p</i> = 0.519 | 0.48 (0.18–1.24)<br><i>p</i> = 0.130 |
| Don't Eat Eggs                          | 40/582   | 1.0 (reference)                      | 14/286  | 0.36 (0.14–0.93)<br><i>p</i> = 0.034 | 0.42 (0.12–1.44)<br><i>p</i> = 0.166 |
| Eat Eggs                                | 66/1074  | 0.76 (0.41–1.39)<br><i>p</i> = 0.368 | 30/845  | 0.41 (0.19–0.88)<br><i>p</i> = 0.022 | 0.49 (0.24–0.99)<br><i>p</i> = 0.046 |
| Don't Eat Food Made<br>from Beans       | 50/797   | 1.0 (reference)                      | 15/410  | 0.41 (0.18–0.96)<br><i>p</i> = 0.041 | 0.41 (0.15–1.13)<br><i>p</i> = 0.085 |
| Eat Food Made from<br>Beans             | 56/859   | 1.08 (0.61–1.92)<br><i>p</i> = 0.800 | 29/721  | 0.56 (0.27–1.18)<br><i>p</i> = 0.126 | 0.50 (0.23–1.07)<br><i>p</i> = 0.074 |
| Don't Eat Salt-<br>preserved Vegetables | 64/901   | 1.0 (reference)                      | 23/639  | 0.38 (0.18–0.80)<br><i>p</i> = 0.011 | 0.37 (0.15–0.87)<br><i>p</i> = 0.022 |
| Eat Salt-preserved<br>Vegetables        | 42/755   | 0.69 (0.40–1.21)<br><i>p</i> = 0.196 | 21/492  | 0.42 (0.20–0.89)<br><i>p</i> = 0.023 | 0.35 (0.14–0.89)<br><i>p</i> = 0.027 |
| Don't Eat Sugar                         | 62/1203  | 1.0 (reference)                      | 27/739  | 0.44 (0.21–0.90)<br><i>p</i> = 0.024 | 0.31 (0.14–0.68)<br><i>p</i> = 0.004 |
| Eat Sugar                               | 44/453   | 2.11 (1.20–3.70)<br><i>p</i> = 0.009 | 17/392  | 1.10 (0.52–2.33)<br><i>p</i> = 0.811 | 0.44 (0.14–1.37)<br><i>p</i> = 0.156 |
| Don't Eat Garlic                        | 58/913   | 1.0 (reference)                      | 18/524  | 0.37 (0.15–0.90)<br><i>p</i> = 0.029 | 0.25 (0.08–0.81)<br><i>p</i> = 0.020 |
| Eat Garlic                              | 48/743   | 1.54 (0.89–2.68)<br><i>p</i> = 0.125 | 26/607  | 0.84 (0.41–1.70)<br><i>p</i> = 0.629 | 0.69 (0.33–1.41)<br><i>p</i> = 0.307 |
| Don't Eat Milk<br>Products              | 91/1371  | 1.0 (reference)                      | 34/716  | 0.51 (0.28–0.92)<br><i>p</i> = 0.025 | 0.53 (0.28–0.98)<br><i>p</i> = 0.043 |
| Eat Milk Products                       | 15/285   | 0.68 (0.31–1.49)<br><i>p</i> = 0.339 | 10/415  | 0.24 (0.08–0.71)<br><i>p</i> = 0.010 | -                                    |
| Don't Eat Nut<br>Products               | 93/1404  | 1.0 (reference)                      | 38/864  | 0.46 (0.26–0.84)<br><i>p</i> = 0.011 | 0.44 (0.24–0.82)<br><i>p</i> = 0.009 |
| Eat Nut Products                        | 13/252   | 0.92 (0.38–2.22)<br><i>p</i> = 0.860 | 6/266   | 0.48 (0.16–1.46)<br><i>p</i> = 0.197 | -                                    |
| Don't Eat Mushroom<br>or Algae          | 99/1493  | 1.0 (reference)                      | 39/874  | 0.49 (0.28–0.85)<br><i>p</i> = 0.011 | 0.48 (0.28–0.85)<br><i>p</i> = 0.012 |
| Eat Mushroom or<br>Algae                | 7/163    | 0.47 (0.15–1.41)<br><i>p</i> = 0.177 | 5/255   | 0.16 (0.03–0.78)<br><i>p</i> = 0.023 | -                                    |
| Don't Eat Vitamins                      | 101/1566 | 1.0 (reference)                      | 39/966  | 0.45 (0.26–0.79)<br><i>p</i> = 0.006 | 0.44 (0.25–0.77)<br><i>p</i> = 0.005 |
| Eat Vitamins                            | 5/90     | 0.28 (0.05–1.54)<br><i>p</i> = 0.143 | 5/165   | 0.28 (0.06–1.33)<br><i>p</i> = 0.110 | -                                    |
| Don't Eat Medicinal<br>Plants           | 103/1625 | 1.0 (reference)                      | 41/1054 | 0.48 (0.28–0.84)<br><i>p</i> = 0.010 | 0.48 (0.27–0.84)<br><i>p</i> = 0.010 |
| Eat Medicinal Plants                    | 3/31     | 3.11 (0.61–15.8)<br><i>p</i> = 0.172 | 3/77    | 1.10 (0.22–5.45)<br><i>p</i> = 0.910 | -                                    |

**Table S2.** The associations between physical exercise and prevalent and incident cognitive impairment in total sample and stratified by dietary habits in older adults  $\geq 80$  years.

|                                     | No Physical Exercise |                                          | Physical Exercise |                                          | OR (95% CI) for the Association Between PE and CI Within Each Stratum of Dietary Habits |
|-------------------------------------|----------------------|------------------------------------------|-------------------|------------------------------------------|-----------------------------------------------------------------------------------------|
|                                     | N With/Without CI    | OR (95% CI)                              | N With/Without CI | OR (95% CI)                              |                                                                                         |
| Cross-sectional Analyses            |                      |                                          |                   |                                          |                                                                                         |
| Total Sample                        | 3592/4902            | 1.0 (reference)                          | 586/1924          | 0.92 (0.79–1.07)<br><br><i>p</i> = 0.261 |                                                                                         |
| Don't Eat Fruits                    | 2485/3189            | 1.0 (reference)                          | 362/1008          | 1.04 (0.86–1.25)<br><br><i>p</i> = 0.706 | 1.03 (0.85–1.24)<br><br><i>p</i> = 0.765                                                |
| Eat Fruits                          | 1106/1713            | 1.07 (0.93–1.24)<br><br><i>p</i> = 0.353 | 224/916           | 0.80 (0.63–1.02)<br><br><i>p</i> = 0.072 | 0.76 (0.59–0.98)<br><br><i>p</i> = 0.031                                                |
| Don't Eat Vegetables                | 752/552              | 1.0 (reference)                          | 72/166            | 0.80 (0.54–1.19)<br><br><i>p</i> = 0.276 | 0.71 (0.48–1.07)<br><br><i>p</i> = 0.100                                                |
| Eat Vegetables                      | 2839/4350            | 0.52 (0.43–0.62)<br><br><i>p</i> <0.001  | 514/1758          | 0.48 (0.39–0.60)<br><br><i>p</i> <0.001  | 0.96 (0.81–1.13)<br><br><i>p</i> = 0.589                                                |
| Don't Drink Tea                     | 2750/3082            | 1.0 (reference)                          | 419/1121          | 0.90 (0.75–1.08)<br><br><i>p</i> = 0.263 | 0.94 (0.78–1.13)<br><br><i>p</i> = 0.499                                                |
| Drink Tea                           | 840/1820             | 0.86 (0.75–0.99)<br><br><i>p</i> = 0.037 | 165/802           | 0.82 (0.64–1.05)<br><br><i>p</i> = 0.111 | 0.89 (0.68–1.17)<br><br><i>p</i> = 0.407                                                |
| Don't Eat Meat                      | 1369/1602            | 1.0 (reference)                          | 166/524           | 0.85 (0.65–1.10)<br><br><i>p</i> = 0.211 | 0.85 (0.65–1.11)<br><br><i>p</i> = 0.241                                                |
| Eat Meat                            | 2221/3300            | 0.87 (0.75–1.00)<br><br><i>p</i> = 0.054 | 419/1399          | 0.83 (0.68–1.01)<br><br><i>p</i> = 0.067 | 0.93 (0.78–1.12)<br><br><i>p</i> = 0.459                                                |
| Don't Eat Fish                      | 2463/3074            | 1.0 (reference)                          | 339/1055          | 0.89 (0.74–1.08)<br><br><i>p</i> = 0.234 | 0.94 (0.77–1.14)<br><br><i>p</i> = 0.505                                                |
| Eat Fish                            | 1127/1828            | 1.06 (0.91–1.23)<br><br><i>p</i> = 0.449 | 246/868           | 1.02 (0.81–1.28)<br><br><i>p</i> = 0.891 | 0.88 (0.70–1.12)<br><br><i>p</i> = 0.305                                                |
| Don't Eat Eggs                      | 1093/1615            | 1.0 (reference)                          | 145/488           | 0.93 (0.71–1.23)<br><br><i>p</i> = 0.610 | 0.86 (0.65–1.14)<br><br><i>p</i> = 0.294                                                |
| Eat Eggs                            | 2497/3287            | 1.08 (0.93–1.25)<br><br><i>p</i> = 0.308 | 440/1435          | 0.98 (0.80–1.20)<br><br><i>p</i> = 0.877 | 0.93 (0.77–1.11)<br><br><i>p</i> = 0.396                                                |
| Don't Eat Food Made from Beans      | 1781/2230            | 1.0 (reference)                          | 292/758           | 1.15 (0.93–1.41)<br><br><i>p</i> = 0.209 | 1.12 (0.90–1.40)<br><br><i>p</i> = 0.305                                                |
| Eat Food Made from Beans            | 1809/2671            | 0.91 (0.79–1.04)<br><br><i>p</i> = 0.153 | 293/1165          | 0.68 (0.55–0.85)<br><br><i>p</i> = 0.001 | 0.74 (0.60–0.92)<br><br><i>p</i> = 0.005                                                |
| Don't Eat Salt-preserved Vegetables | 2645/3168            | 1.0 (reference)                          | 407/1246          | 0.88 (0.73–1.05)<br><br><i>p</i> = 0.165 | 0.87 (0.72–1.05)<br><br><i>p</i> = 0.145                                                |
| Eat Salt-preserved Vegetables       | 945/1733             | 0.86 (0.74–0.99)<br><br><i>p</i> = 0.033 | 178/677           | 0.86 (0.67–1.09)<br><br><i>p</i> = 0.209 | 0.98 (0.76–1.28)<br><br><i>p</i> = 0.907                                                |
| Don't Eat Sugar                     | 2084/3199            | 1.0 (reference)                          | 309/1176          | 0.82 (0.68–1.00)<br><br><i>p</i> = 0.050 | 0.79 (0.65–0.97)<br><br><i>p</i> = 0.021                                                |

|                              |           |                                      |          |                                      |                                      |
|------------------------------|-----------|--------------------------------------|----------|--------------------------------------|--------------------------------------|
| Eat Sugar                    | 1506/1703 | 1.03 (0.89–1.18)<br><i>p</i> = 0.699 | 275/747  | 1.10 (0.88–1.38)<br><i>p</i> = 0.394 | 1.14 (0.89–1.45)<br><i>p</i> = 0.294 |
| Don't Eat Garlic             | 2426/3092 | 1.0 (reference)                      | 338/1030 | 0.89 (0.74–1.08)<br><i>p</i> = 0.250 | 0.90 (0.74–1.10)<br><i>p</i> = 0.299 |
| Eat Garlic                   | 1163/1810 | 1.08 (0.94–1.24)<br><i>p</i> = 0.259 | 247/893  | 1.03 (0.83–1.29)<br><i>p</i> = 0.774 | 0.91 (0.72–1.16)<br><i>p</i> = 0.462 |
| Don't Eat Milk Products      | 2529/3710 | 1.0 (reference)                      | 375/1136 | 0.98 (0.82–1.18)<br><i>p</i> = 0.864 | 1.00 (0.83–1.19)<br><i>p</i> = 0.962 |
| Eat Milk Products            | 1061/1192 | 1.02 (0.87–1.20)<br><i>p</i> = 0.785 | 210/787  | 0.81 (0.63–1.04)<br><i>p</i> = 0.103 | 0.76 (0.58–1.00)<br><i>p</i> = 0.052 |
| Don't Eat Nut Products       | 3389/4527 | 1.0 (reference)                      | 543/1684 | 0.91 (0.78–1.06)<br><i>p</i> = 0.232 | 0.91 (0.78–1.07)<br><i>p</i> = 0.248 |
| Eat Nut Products             | 201/375   | 0.85 (0.65–1.12)<br><i>p</i> = 0.252 | 42/239   | 0.87 (0.55–1.40)<br><i>p</i> = 0.571 | 0.94 (0.53–1.68)<br><i>p</i> = 0.842 |
| Don't Eat Mushroom or Algae  | 3317/4460 | 1.0 (reference)                      | 508/1588 | 0.93 (0.80–1.09)<br><i>p</i> = 0.386 | 0.95 (0.81–1.11)<br><i>p</i> = 0.523 |
| Eat Mushroom or Algae        | 273/442   | 1.00 (0.79–1.27)<br><i>p</i> = 0.997 | 76/335   | 0.81 (0.55–1.20)<br><i>p</i> = 0.298 | 0.67 (0.42–1.07)<br><i>p</i> = 0.090 |
| Don't Eat Vitamins           | 3276/4503 | 1.0 (reference)                      | 532/1637 | 0.94 (0.81–1.10)<br><i>p</i> = 0.473 | 0.94 (0.80–1.10)<br><i>p</i> = 0.424 |
| Eat Vitamins                 | 314/399   | 1.10 (0.87–1.40)<br><i>p</i> = 0.434 | 53/286   | 0.79 (0.52–1.20)<br><i>p</i> = 0.272 | 0.82 (0.49–1.38)<br><i>p</i> = 0.458 |
| Don't Eat Medicinal Plants   | 3505/4765 | 1.0 (reference)                      | 570/1795 | 0.92 (0.79–1.07)<br><i>p</i> = 0.275 | 0.92 (0.79–1.07)<br><i>p</i> = 0.296 |
| Eat Medicinal Plants         | 85/137    | 0.54 (0.36–0.83)<br><i>p</i> = 0.004 | 15/128   | 0.48 (0.23–0.99)<br><i>p</i> = 0.048 | 0.54 (0.18–1.68)<br><i>p</i> = 0.289 |
| <b>Longitudinal Analyses</b> |           |                                      |          |                                      |                                      |
| Total Sample                 | 728/1611  | 1.0 (reference)                      | 240/806  | 0.98 (0.74–1.29)<br><i>p</i> = 0.862 |                                      |
| Don't Eat Fruits             | 480/1045  | 1.0 (reference)                      | 137/436  | 0.98 (0.70–1.38)<br><i>p</i> = 0.906 | 1.11 (0.78–1.58)<br><i>p</i> = 0.561 |
| Eat Fruits                   | 248/566   | 0.62 (0.45–0.86)<br><i>p</i> = 0.004 | 103/370  | 0.60 (0.38–0.93)<br><i>p</i> = 0.022 | 0.86 (0.50–1.49)<br><i>p</i> = 0.592 |
| Don't Eat Vegetables         | 69/167    | 1.0 (reference)                      | 13/66    | 0.79 (0.29–2.15)<br><i>p</i> = 0.647 | -                                    |
| Eat Vegetables               | 659/1444  | 1.59 (0.95–2.65)<br><i>p</i> = 0.079 | 227/740  | 1.57 (0.90–2.75)<br><i>p</i> = 0.111 | 0.97 (0.73–1.31)<br><i>p</i> = 0.863 |
| Don't Drink Tea              | 486/976   | 1.0 (reference)                      | 163/452  | 0.93 (0.66–1.32)<br><i>p</i> = 0.688 | 0.95 (0.65–1.36)<br><i>p</i> = 0.763 |
| Drink Tea                    | 242/635   | 0.76 (0.55–1.03)<br><i>p</i> = 0.079 | 77/354   | 0.80 (0.52–1.22)<br><i>p</i> = 0.293 | 0.94 (0.57–1.56)<br><i>p</i> = 0.807 |
| Don't Eat Meat               | 235/558   | 1.0 (reference)                      | 44/216   | 0.84 (0.50–1.41)<br><i>p</i> = 0.505 | 0.72 (0.39–1.33)<br><i>p</i> = 0.296 |
| Eat Meat                     | 493/1053  | 1.12 (0.81–1.55)                     | 196/590  | 1.16 (0.78–1.71)                     | 1.04 (0.74–1.47)                     |

|                                            |          | $p = 0.500$      |         | $p = 0.474$      | $p = 0.809$      |
|--------------------------------------------|----------|------------------|---------|------------------|------------------|
| Don't Eat Fish                             | 468/1041 | 1.0 (reference)  | 130/458 | 0.84 (0.59–1.21) | 0.87 (0.59–1.27) |
|                                            |          |                  |         | $p = 0.351$      | $p = 0.459$      |
| Eat Fish                                   | 260/570  | 0.93 (0.67–1.28) | 110/348 | 1.13 (0.74–1.72) | 1.08 (0.66–1.74) |
|                                            |          | $p = 0.649$      |         | $p = 0.585$      | $p = 0.768$      |
| Don't Eat Eggs                             | 234/542  | 1.0 (reference)  | 67/203  | 1.17 (0.71–1.92) | 1.59 (0.89–2.85) |
|                                            |          |                  |         | $p = 0.533$      | $p = 0.118$      |
| Eat Eggs                                   | 494/1069 | 0.87 (0.63–1.21) | 173/603 | 0.79 (0.53–1.18) | 0.85 (0.60–1.20) |
|                                            |          | $p = 0.410$      |         | $p = 0.245$      | $p = 0.356$      |
| Don't Eat Food<br>Made from Beans          | 326/784  | 1.0 (reference)  | 98/329  | 1.01 (0.67–1.54) | 1.23 (0.79–1.93) |
|                                            |          |                  |         | $p = 0.948$      | $p = 0.365$      |
| Eat Food Made from<br>Beans                | 402/826  | 1.40 (1.04–1.90) | 142/477 | 1.33 (0.89–1.98) | 0.93 (0.63–1.36) |
|                                            |          | $p = 0.027$      |         | $p = 0.162$      | $p = 0.695$      |
| Don't Eat Salt-<br>preserved<br>Vegetables | 466/1023 | 1.0 (reference)  | 161/522 | 1.11 (0.79–1.56) | 1.01 (0.70–1.44) |
|                                            |          |                  |         | $p = 0.542$      | $p = 0.974$      |
| Eat Salt-preserved<br>Vegetables           | 262/587  | 1.32 (0.97–1.79) | 79/284  | 1.01 (0.64–1.58) | 0.92 (0.54–1.58) |
|                                            |          | $p = 0.077$      |         | $p = 0.971$      | $p = 0.762$      |
| Don't Eat Sugar                            | 470/1037 | 1.0 (reference)  | 134/508 | 0.85 (0.59–1.22) | 0.89 (0.61–1.32) |
|                                            |          |                  |         | $p = 0.371$      | $p = 0.577$      |
| Eat Sugar                                  | 258/574  | 1.06 (0.79–1.44) | 106/298 | 1.25 (0.84–1.87) | 1.22 (0.77–1.94) |
|                                            |          | $p = 0.684$      |         | $p = 0.270$      | $p = 0.391$      |
| Don't Eat Garlic                           | 458/1003 | 1.0 (reference)  | 125/407 | 1.06 (0.73–1.54) | 1.10 (0.74–1.65) |
|                                            |          |                  |         | $p = 0.754$      | $p = 0.630$      |
| Eat Garlic                                 | 270/608  | 1.12 (0.83–1.52) | 115/399 | 0.99 (0.67–1.47) | 0.95 (0.60–1.49) |
|                                            |          | $p = 0.456$      |         | $p = 0.979$      | $p = 0.813$      |
| Don't Eat Milk<br>Products                 | 556/1242 | 1.0 (reference)  | 154/471 | 0.96 (0.68–1.34) | 0.98 (0.69–1.40) |
|                                            |          |                  |         | $p = 0.795$      | $p = 0.933$      |
| Eat Milk Products                          | 172/369  | 0.71 (0.50–1.02) | 86/335  | 0.72 (0.47–1.12) | 0.82 (0.46–1.43) |
|                                            |          | $p = 0.065$      |         | $p = 0.144$      | $p = 0.478$      |
| Don't Eat Nut<br>Products                  | 670/1473 | 1.0 (reference)  | 222/698 | 1.01 (0.75–1.35) | 1.03 (0.77–1.39) |
|                                            |          |                  |         | $p = 0.968$      | $p = 0.829$      |
| Eat Nut Products                           | 58/138   | 1.23 (0.72–2.11) | 18/108  | 0.91 (0.44–1.87) | -                |
|                                            |          | $p = 0.449$      |         | $p = 0.788$      |                  |
| Don't Eat Mushroom<br>or Algae             | 669/1491 | 1.0 (reference)  | 207/657 | 0.98 (0.73–1.33) | 1.03 (0.76–1.40) |
|                                            |          |                  |         | $p = 0.916$      | $p = 0.831$      |
| Eat Mushroom or<br>Algae                   | 59/120   | 0.92 (0.52–1.64) | 33/149  | 0.84 (0.44–1.58) | -                |
|                                            |          | $p = 0.776$      |         | $p = 0.587$      |                  |
| Don't Eat Vitamins                         | 672/1500 | 1.0 (reference)  | 214/692 | 0.98 (0.73–1.32) | 1.01 (0.75–1.36) |
|                                            |          |                  |         | $p = 0.898$      | $p = 0.959$      |
| Eat Vitamins                               | 56/111   | 1.18 (0.67–2.06) | 26/114  | 1.09 (0.57–2.11) | -                |
|                                            |          | $p = 0.572$      |         | $p = 0.789$      |                  |
| Don't Eat Medicinal<br>Plants              | 711/1580 | 1.0 (reference)  | 233/752 | 1.00 (0.75–1.33) | 0.99 (0.74–1.33) |
|                                            |          |                  |         | $p = 0.984$      | $p = 0.966$      |

|                      |       |                  |      |                  |   |
|----------------------|-------|------------------|------|------------------|---|
| Eat Medicinal Plants | 17/31 | 1.31 (0.50–3.46) | 7/54 | 0.71 (0.25–2.03) | - |
|                      |       | $p = 0.586$      |      | $p = 0.529$      |   |

**Table S3.** The associations between physical exercise and prevalent and incident cognitive impairment in total sample and stratified by dietary habits in older males.

|                                     | No Physical Exercise |                                          | Physical Exercise |                                          | OR (95% CI) for the Association Between PE and CI Within Each Stratum of Dietary Habits |
|-------------------------------------|----------------------|------------------------------------------|-------------------|------------------------------------------|-----------------------------------------------------------------------------------------|
|                                     | N With/Without CI    | OR (95% CI)                              | N With/Without CI | OR (95% CI)                              |                                                                                         |
| Cross-sectional Analyses            |                      |                                          |                   |                                          |                                                                                         |
| Total Sample                        | 948/3102             | 1.0 (reference)                          | 241/1964          | 0.98 (0.79–1.22)<br><br><i>p</i> = 0.855 |                                                                                         |
| Don't Eat Fruits                    | 700/2015             | 1.0 (reference)                          | 152/988           | 1.10 (0.84–1.44)<br><br><i>p</i> = 0.469 | 1.05 (0.80–1.38)<br><br><i>p</i> = 0.726                                                |
| Eat Fruits                          | 247/1087             | 1.06 (0.82–1.37)<br><br><i>p</i> = 0.649 | 89/976            | 0.85 (0.60–1.19)<br><br><i>p</i> = 0.340 | 0.85 (0.58–1.25)<br><br><i>p</i> = 0.417                                                |
| Don't Eat Vegetables                | 206/344              | 1.0 (reference)                          | 35/139            | 0.91 (0.53–1.58)<br><br><i>p</i> = 0.746 | 0.76 (0.42–1.36)<br><br><i>p</i> = 0.354                                                |
| Eat Vegetables                      | 741/2758             | 0.51 (0.38–0.68)<br><br><i>p</i> <0.001  | 206/1825          | 0.50 (0.36–0.70)<br><br><i>p</i> <0.001  | 1.04 (0.81–1.32)<br><br><i>p</i> = 0.771                                                |
| Don't Drink Tea                     | 644/1616             | 1.0 (reference)                          | 141/910           | 0.92 (0.69–1.23)<br><br><i>p</i> = 0.583 | 0.95 (0.70–1.27)<br><br><i>p</i> = 0.710                                                |
| Drink Tea                           | 304/1485             | 0.88 (0.70–1.11)<br><br><i>p</i> = 0.280 | 100/1053          | 0.93 (0.68–1.28)<br><br><i>p</i> = 0.659 | 1.02 (0.73–1.42)<br><br><i>p</i> = 0.924                                                |
| Don't Eat Meat                      | 386/1003             | 1.0 (reference)                          | 64/505            | 0.77 (0.52–1.12)<br><br><i>p</i> = 0.175 | 0.75 (0.50–1.11)<br><br><i>p</i> = 0.147                                                |
| Eat Meat                            | 562/2098             | 0.81 (0.64–1.03)<br><br><i>p</i> = 0.090 | 177/1458          | 0.89 (0.66–1.21)<br><br><i>p</i> = 0.451 | 1.10 (0.84–1.45)<br><br><i>p</i> = 0.468                                                |
| Don't Eat Fish                      | 635/1906             | 1.0 (reference)                          | 131/986           | 0.97 (0.73–1.29)<br><br><i>p</i> = 0.831 | 1.00 (0.75–1.34)<br><br><i>p</i> = 0.991                                                |
| Eat Fish                            | 313/1195             | 1.25 (0.98–1.61)<br><br><i>p</i> = 0.076 | 110/977           | 1.25 (0.90–1.72)<br><br><i>p</i> = 0.182 | 0.97 (0.69–1.36)<br><br><i>p</i> = 0.849                                                |
| Don't Eat Eggs                      | 314/1073             | 1.0 (reference)                          | 61/462            | 1.08 (0.73–1.60)<br><br><i>p</i> = 0.700 | 0.92 (0.60–1.39)<br><br><i>p</i> = 0.684                                                |
| Eat Eggs                            | 634/2028             | 1.16 (0.91–1.49)<br><br><i>p</i> = 0.229 | 180/1501          | 1.10 (0.81–1.49)<br><br><i>p</i> = 0.554 | 0.97 (0.75–1.26)<br><br><i>p</i> = 0.836                                                |
| Don't Eat Food Made from Beans      | 455/1457             | 1.0 (reference)                          | 119/710           | 1.36 (1.00–1.86)<br><br><i>p</i> = 0.049 | 1.42 (1.03–1.96)<br><br><i>p</i> = 0.035                                                |
| Eat Food Made from Beans            | 493/1644             | 1.02 (0.81–1.29)<br><br><i>p</i> = 0.852 | 122/1253          | 0.76 (0.55–1.04)<br><br><i>p</i> = 0.087 | 0.72 (0.53–0.98)<br><br><i>p</i> = 0.034                                                |
| Don't Eat Salt-preserved Vegetables | 675/1921             | 1.0 (reference)                          | 168/1241          | 0.98 (0.75–1.27)<br><br><i>p</i> = 0.857 | 0.97 (0.74–1.28)<br><br><i>p</i> = 0.835                                                |
| Eat Salt-preserved Vegetables       | 273/1180             | 1.01 (0.79–1.28)<br><br><i>p</i> = 0.959 | 73/722            | 0.99 (0.71–1.39)<br><br><i>p</i> = 0.969 | 0.97 (0.66–1.42)<br><br><i>p</i> = 0.868                                                |

|                              |          |                                      |          |                                      |                                      |
|------------------------------|----------|--------------------------------------|----------|--------------------------------------|--------------------------------------|
| Don't Eat Sugar              | 637/2128 | 1.0 (reference)                      | 146/1246 | 0.94 (0.72–1.23)<br><i>p</i> = 0.660 | 0.93 (0.71–1.22)<br><i>p</i> = 0.592 |
| Eat Sugar                    | 311/973  | 0.87 (0.68–1.11)<br><i>p</i> = 0.247 | 95/717   | 0.91 (0.65–1.28)<br><i>p</i> = 0.601 | 1.09 (0.74–1.60)<br><i>p</i> = 0.664 |
| Don't Eat Garlic             | 628/1834 | 1.0 (reference)                      | 130/927  | 0.93 (0.70–1.23)<br><i>p</i> = 0.602 | 0.92 (0.69–1.23)<br><i>p</i> = 0.572 |
| Eat Garlic                   | 320/1267 | 0.96 (0.75–1.21)<br><i>p</i> = 0.714 | 111/1036 | 1.01 (0.74–1.39)<br><i>p</i> = 0.937 | 1.02 (0.72–1.44)<br><i>p</i> = 0.928 |
| Don't Eat Milk Products      | 666/2444 | 1.0 (reference)                      | 152/1174 | 1.08 (0.83–1.40)<br><i>p</i> = 0.572 | 1.11 (0.85–1.44)<br><i>p</i> = 0.454 |
| Eat Milk Products            | 282/657  | 1.19 (0.90–1.56)<br><i>p</i> = 0.218 | 89/789   | 0.96 (0.67–1.36)<br><i>p</i> = 0.806 | 0.79 (0.53–1.19)<br><i>p</i> = 0.257 |
| Don't Eat Nut Products       | 893/2763 | 1.0 (reference)                      | 225/1623 | 1.00 (0.79–1.25)<br><i>p</i> = 0.974 | 0.98 (0.78–1.23)<br><i>p</i> = 0.880 |
| Eat Nut Products             | 55/338   | 0.76 (0.48–1.20)<br><i>p</i> = 0.242 | 16/339   | 0.60 (0.29–1.21)<br><i>p</i> = 0.154 | 0.65 (0.22–1.92)<br><i>p</i> = 0.438 |
| Don't Eat Mushroom or Algae  | 875/2823 | 1.0 (reference)                      | 212/1573 | 1.03 (0.81–1.29)<br><i>p</i> = 0.831 | 1.05 (0.83–1.33)<br><i>p</i> = 0.665 |
| Eat Mushroom or Algae        | 73/278   | 1.07 (0.71–1.60)<br><i>p</i> = 0.743 | 29/389   | 0.72 (0.41–1.28)<br><i>p</i> = 0.266 | 0.55 (0.27–1.14)<br><i>p</i> = 0.108 |
| Don't Eat Vitamins           | 857/2916 | 1.0 (reference)                      | 223/1688 | 1.03 (0.82–1.29)<br><i>p</i> = 0.827 | 1.04 (0.83–1.31)<br><i>p</i> = 0.734 |
| Eat Vitamins                 | 91/185   | 1.12 (0.73–1.72)<br><i>p</i> = 0.605 | 18/275   | 0.68 (0.36–1.30)<br><i>p</i> = 0.244 | 0.80 (0.30–2.11)<br><i>p</i> = 0.657 |
| Don't Eat Medicinal Plants   | 916/3034 | 1.0 (reference)                      | 235/1821 | 1.02 (0.81–1.27)<br><i>p</i> = 0.886 | 1.03 (0.82–1.28)<br><i>p</i> = 0.823 |
| Eat Medicinal Plants         | 32/67    | 1.04 (0.52–2.09)<br><i>p</i> = 0.910 | 6/142    | 0.29 (0.09–1.00)<br><i>p</i> = 0.051 | -                                    |
| <b>Longitudinal Analyses</b> |          |                                      |          |                                      |                                      |
| Total Sample <sup>‡</sup>    | 267/1516 | 1.0 (reference)                      | 130/1121 | 0.70 (0.48–1.04)<br><i>p</i> = 0.074 |                                      |
| Don't Eat Fruits             | 180/952  | 1.0 (reference)                      | 66/564   | 0.71 (0.44–1.15)<br><i>p</i> = 0.167 | 0.84 (0.51–1.39)<br><i>p</i> = 0.503 |
| Eat Fruits                   | 87/564   | 0.72 (0.44–1.17)<br><i>p</i> = 0.185 | 64/557   | 0.49 (0.28–0.88)<br><i>p</i> = 0.017 | 0.50 (0.23–1.08)<br><i>p</i> = 0.078 |
| Don't Eat Vegetables         | 28/136   | 1.0 (reference)                      | 5/69     | 0.89 (0.19–4.21)<br><i>p</i> = 0.885 | -                                    |
| Eat Vegetables               | 239/1380 | 2.93 (1.15–7.51)<br><i>p</i> = 0.025 | 125/1052 | 2.04 (0.77–5.41)<br><i>p</i> = 0.153 | 0.69 (0.47–1.03)<br><i>p</i> = 0.073 |
| Don't Drink Tea              | 141/758  | 1.0 (reference)                      | 69/501   | 0.59 (0.34–1.03)<br><i>p</i> = 0.063 | 0.69 (0.37–1.29)<br><i>p</i> = 0.245 |
| Drink Tea                    | 126/757  | 0.86 (0.55–1.35)<br><i>p</i> = 0.513 | 61/619   | 0.70 (0.41–1.19)<br><i>p</i> = 0.193 | 0.76 (0.43–1.34)<br><i>p</i> = 0.343 |
| Don't Eat Meat               | 84/490   | 1.0 (reference)                      | 20/290   | 0.64 (0.31–1.34)                     | 0.54 (0.19–1.52)                     |



|                                            |          |                  |         |                  |                  |
|--------------------------------------------|----------|------------------|---------|------------------|------------------|
|                                            |          |                  |         | $p = 0.235$      | $p = 0.243$      |
| Eat Meat                                   | 183/1025 | 1.26 (0.76–2.08) | 110/830 | 0.91 (0.51–1.63) | 0.68 (0.43–1.08) |
|                                            |          | $p = 0.372$      |         | $p = 0.761$      | $p = 0.106$      |
| Don't Eat Fish                             | 169/926  | 1.0 (reference)  | 67/572  | 0.68 (0.41–1.13) | 0.57 (0.32–1.00) |
|                                            |          |                  |         | $p = 0.136$      | $p = 0.050$      |
| Eat Fish                                   | 98/589   | 1.34 (0.84–2.14) | 63/548  | 0.99 (0.57–1.71) | 0.69 (0.36–1.31) |
|                                            |          | $p = 0.218$      |         | $p = 0.959$      | $p = 0.259$      |
| Don't Eat Eggs                             | 83/528   | 1.0 (reference)  | 28/256  | 1.00 (0.50–1.98) | 1.13 (0.44–2.89) |
|                                            |          |                  |         | $p = 0.992$      | $p = 0.796$      |
| Eat Eggs                                   | 184/987  | 1.06 (0.65–1.73) | 102/864 | 0.65 (0.37–1.15) | 0.60 (0.37–0.96) |
|                                            |          | $p = 0.820$      |         | $p = 0.140$      | $p = 0.034$      |
| Don't Eat Food<br>Made from Beans          | 124/737  | 1.0 (reference)  | 52/417  | 0.73 (0.42–1.28) | 0.83 (0.44–1.55) |
|                                            |          |                  |         | $p = 0.274$      | $p = 0.553$      |
| Eat Food Made from<br>Beans                | 143/778  | 1.12 (0.72–1.76) | 78/703  | 0.77 (0.44–1.34) | 0.69 (0.40–1.19) |
|                                            |          | $p = 0.611$      |         | $p = 0.354$      | $p = 0.179$      |
| Don't Eat Salt-<br>preserved<br>Vegetables | 165/905  | 1.0 (reference)  | 91/685  | 0.92 (0.57–1.47) | 0.84 (0.51–1.40) |
|                                            |          |                  |         | $p = 0.726$      | $p = 0.510$      |
| Eat Salt-preserved<br>Vegetables           | 102/610  | 1.34 (0.85–2.12) | 39/435  | 0.60 (0.33–1.09) | 0.46 (0.22–0.99) |
|                                            |          | $p = 0.205$      |         | $p = 0.095$      | $p = 0.047$      |
| Don't Eat Sugar                            | 175/1037 | 1.0 (reference)  | 75/762  | 0.55 (0.33–0.91) | 0.54 (0.31–0.92) |
|                                            |          |                  |         | $p = 0.020$      | $p = 0.024$      |
| Eat Sugar                                  | 92/478   | 0.95 (0.60–1.52) | 55/394  | 0.94 (0.56–1.60) | 1.40 (0.70–2.80) |
|                                            |          | $p = 0.844$      |         | $p = 0.832$      | $p = 0.345$      |
| Don't Eat Garlic                           | 168/867  | 1.0 (reference)  | 60/516  | 0.63 (0.37–1.07) | 0.53 (0.29–0.98) |
|                                            |          |                  |         | $p = 0.087$      | $p = 0.041$      |
| Eat Garlic                                 | 99/648   | 0.98 (0.63–1.55) | 70/604  | 0.78 (0.47–1.30) | 0.74 (0.39–1.38) |
|                                            |          | $p = 0.948$      |         | $p = 0.337$      | $p = 0.339$      |
| Don't Eat Milk<br>Products                 | 196/1246 | 1.0 (reference)  | 81/685  | 0.80 (0.51–1.27) | 0.75 (0.46–1.23) |
|                                            |          |                  |         | $p = 0.348$      | $p = 0.256$      |
| Eat Milk Products                          | 71/269   | 1.24 (0.73–2.12) | 49/435  | 0.68 (0.38–1.23) | 0.27 (0.16–0.63) |
|                                            |          | $p = 0.426$      |         | $p = 0.202$      | $p = 0.002$      |
| Don't Eat Nut<br>Products                  | 242/1307 | 1.0 (reference)  | 119/903 | 0.77 (0.51–1.16) | 0.84 (0.55–1.27) |
|                                            |          |                  |         | $p = 0.210$      | $p = 0.407$      |
| Eat Nut Products                           | 25/208   | 1.34 (0.67–2.67) | 11/216  | 0.49 (0.20–1.21) | -                |
|                                            |          | $p = 0.410$      |         | $p = 0.123$      |                  |
| Don't Eat Mushroom<br>or Algae             | 238/1396 | 1.0 (reference)  | 109/895 | 0.70 (0.47–1.06) | 0.67 (0.44–1.03) |
|                                            |          |                  |         | $p = 0.090$      | $p = 0.066$      |
| Eat Mushroom or<br>Algae                   | 29/119   | 1.07 (0.47–2.42) | 21/224  | 0.77 (0.36–1.66) | -                |
|                                            |          | $p = 0.875$      |         | $p = 0.504$      |                  |
| Don't Eat Vitamins                         | 248/1448 | 1.0 (reference)  | 116/979 | 0.71 (0.48–1.07) | 0.68 (0.45–1.03) |
|                                            |          |                  |         | $p = 0.100$      | $p = 0.068$      |
| Eat Vitamins                               | 19/67    | 1.26 (0.49–3.25) | 14/141  | 0.77 (0.32–1.83) | -                |
|                                            |          | $p = 0.630$      |         | $p = 0.547$      |                  |

|                            |          |                                      |          |                                      |                                      |
|----------------------------|----------|--------------------------------------|----------|--------------------------------------|--------------------------------------|
| Don't Eat Medicinal Plants | 259/1490 | 1.0 (reference)                      | 126/1042 | 0.74 (0.50–1.10)<br><i>p</i> = 0.135 | 0.73 (0.49–1.08)<br><i>p</i> = 0.113 |
| Eat Medicinal Plants       | 8/25     | 2.07 (0.53–8.13)<br><i>p</i> = 0.296 | 4/78     | 0.42 (0.11–1.59)<br><i>p</i> = 0.200 | -                                    |

**Table S4.** The associations between physical exercise and prevalent and incident cognitive impairment in total sample and stratified by dietary habits in older females.

|                                | No Physical Exercise |                                      | Physical Exercise |                                      | OR (95% CI) for the Association Between PE and CI Within Each Stratum of Dietary Habits |
|--------------------------------|----------------------|--------------------------------------|-------------------|--------------------------------------|-----------------------------------------------------------------------------------------|
|                                | N With/Without CI    | OR (95% CI)                          | N With/Without CI | OR (95% CI)                          |                                                                                         |
| Cross-sectional Analyses       |                      |                                      |                   |                                      |                                                                                         |
| Total Sample                   | 2748/4040            | 1.0 (reference)                      | 384/1508          | 0.87 (0.72–1.05)<br><i>p</i> = 0.150 |                                                                                         |
| Don't Eat Fruits               | 1863/2528            | 1.0 (reference)                      | 237/732           | 1.02 (0.81–1.29)<br><i>p</i> = 0.869 | 1.02 (0.80–1.29)<br><i>p</i> = 0.899                                                    |
| Eat Fruits                     | 885/1512             | 1.06 (0.89–1.26)<br><i>p</i> = 0.507 | 147/776           | 0.70 (0.51–0.96)<br><i>p</i> = 0.027 | 0.66 (0.48–0.93)<br><i>p</i> = 0.016                                                    |
| Don't Eat Vegetables           | 566/384              | 1.0 (reference)                      | 48/109            | 0.85 (0.52–1.40)<br><i>p</i> = 0.525 | 0.80 (0.49–1.32)<br><i>p</i> = 0.382                                                    |
| Eat Vegetables                 | 2182/3656            | 0.51 (0.41–0.63)<br><i>p</i> <0.001  | 336/1399          | 0.44 (0.34–0.58)<br><i>p</i> <0.001  | 0.89 (0.72–1.09)<br><i>p</i> = 0.255                                                    |
| Don't Drink Tea                | 2174/2719            | 1.0 (reference)                      | 302/1012          | 0.91 (0.73–1.13)<br><i>p</i> = 0.388 | 0.94 (0.76–1.18)<br><i>p</i> = 0.610                                                    |
| Drink Tea                      | 572/1321             | 0.88 (0.75–1.05)<br><i>p</i> = 0.162 | 80/495            | 0.67 (0.47–0.97)<br><i>p</i> = 0.034 | 0.72 (0.49–1.07)<br><i>p</i> = 0.103                                                    |
| Don't Eat Meat                 | 1037/1387            | 1.0 (reference)                      | 118/447           | 0.90 (0.66–1.25)<br><i>p</i> = 0.540 | 0.91 (0.66–1.26)<br><i>p</i> = 0.578                                                    |
| Eat Meat                       | 1709/2653            | 0.86 (0.72–1.02)<br><i>p</i> = 0.082 | 265/1060          | 0.73 (0.57–0.95)<br><i>p</i> = 0.017 | 0.83 (0.65–1.05)<br><i>p</i> = 0.121                                                    |
| Don't Eat Fish                 | 1898/2522            | 1.0 (reference)                      | 234/818           | 0.88 (0.70–1.12)<br><i>p</i> = 0.312 | 0.90 (0.71–1.15)<br><i>p</i> = 0.412                                                    |
| Eat Fish                       | 848/1518             | 1.02 (0.86–1.22)<br><i>p</i> = 0.818 | 149/689           | 0.86 (0.63–1.17)<br><i>p</i> = 0.344 | 0.81 (0.59–1.10)<br><i>p</i> = 0.176                                                    |
| Don't Eat Eggs                 | 821/1337             | 1.0 (reference)                      | 99/420            | 0.88 (0.62–1.24)<br><i>p</i> = 0.464 | 0.83 (0.58–1.18)<br><i>p</i> = 0.289                                                    |
| Eat Eggs                       | 1925/2703            | 1.05 (0.88–1.25)<br><i>p</i> = 0.594 | 284/1087          | 0.91 (0.70–1.17)<br><i>p</i> = 0.452 | 0.88 (0.70–1.11)<br><i>p</i> = 0.265                                                    |
| Don't Eat Food Made from Beans | 1385/1824            | 1.0 (reference)                      | 190/593           | 0.99 (0.76–1.30)<br><i>p</i> = 0.947 | 0.93 (0.70–1.23)<br><i>p</i> = 0.602                                                    |
| Eat Food Made from Beans       | 1361/2215            | 0.86 (0.73–1.01)<br><i>p</i> = 0.070 | 193/914           | 0.66 (0.51–0.87)<br><i>p</i> = 0.004 | 0.79 (0.61–1.04)<br><i>p</i> = 0.094                                                    |
| Don't Eat Salt-preserved       | 2038/2482            | 1.0 (reference)                      | 261/901           | 0.82 (0.65–1.03)<br><i>p</i> = 0.094 | 0.81 (0.64–1.02)<br><i>p</i> = 0.072                                                    |

|                       |           |                  |          |                  |                  |
|-----------------------|-----------|------------------|----------|------------------|------------------|
| Vegetables            |           |                  |          |                  |                  |
| Eat Salt-preserved    | 708/1557  | 0.80 (0.68–0.95) | 122/606  | 0.78 (0.57–1.07) | 1.02 (0.73–1.42) |
| Vegetables            |           | $p = 0.010$      |          | $p = 0.119$      | $p = 0.916$      |
| Don't Eat Sugar       | 1525/2672 | 1.0 (reference)  | 189/939  | 0.74 (0.57–0.95) | 0.72 (0.56–0.93) |
|                       |           |                  |          | $p = 0.018$      | $p = 0.012$      |
| Eat Sugar             | 1221/1368 | 1.14 (0.97–1.35) | 193/568  | 1.23 (0.93–1.63) | 1.11 (0.82–1.49) |
|                       |           | $p = 0.110$      |          | $p = 0.142$      | $p = 0.507$      |
| Don't Eat Garlic      | 1872/2488 | 1.0 (reference)  | 227/805  | 0.84 (0.66–1.07) | 0.84 (0.66–1.08) |
|                       |           |                  |          | $p = 0.154$      | $p = 0.180$      |
| Eat Garlic            | 873/1552  | 1.12 (0.95–1.33) | 156/702  | 1.03 (0.77–1.38) | 0.89 (0.65–1.21) |
|                       |           | $p = 0.164$      |          | $p = 0.821$      | $p = 0.457$      |
| Don't Eat Milk        | 1946/3113 | 1.0 (reference)  | 255/913  | 0.95 (0.76–1.19) | 0.94 (0.75–1.18) |
| Products              |           |                  |          | $p = 0.673$      | $p = 0.591$      |
| Eat Milk Products     | 800/927   | 0.97 (0.80–1.17) | 128/594  | 0.69 (0.49–0.96) | 0.69 (0.48–1.01) |
|                       |           | $p = 0.767$      |          | $p = 0.027$      | $p = 0.054$      |
| Don't Eat Nut         | 2597/3687 | 1.0 (reference)  | 354/1244 | 0.85 (0.70–1.04) | 0.86 (0.70–1.05) |
| Products              |           |                  |          | $p = 0.115$      | $p = 0.130$      |
| Eat Nut Products      | 149/353   | 0.82 (0.59–1.14) | 29/263   | 0.90 (0.50–1.62) | 1.00 (0.46–2.17) |
|                       |           | $p = 0.233$      |          | $p = 0.715$      | $p = 0.996$      |
| Don't Eat             | 2540/3658 | 1.0 (reference)  | 331/1199 | 0.87 (0.71–1.06) | 0.87 (0.71–1.07) |
| Mushroom or           |           |                  |          | $p = 0.176$      | $p = 0.180$      |
| Algae                 |           |                  |          |                  |                  |
| Eat Mushroom or       | 206/381   | 1.00 (0.75–1.34) | 51/307   | 0.87 (0.52–1.45) | 0.88 (0.46–1.68) |
| Algae                 |           | $p = 0.990$      |          | $p = 0.584$      | $p = 0.698$      |
| Don't Eat             | 2517/3705 | 1.0 (reference)  | 348/1254 | 0.89 (0.73–1.09) | 0.88 (0.72–1.07) |
| Vitamins              |           |                  |          | $p = 0.264$      | $p = 0.194$      |
| Eat Vitamins          | 229/335   | 1.12 (0.84–1.48) | 35/253   | 0.78 (0.46–1.34) | 0.84 (0.43–1.64) |
|                       |           | $p = 0.445$      |          | $p = 0.372$      | $p = 0.603$      |
| Don't Eat             | 2691/3924 | 1.0 (reference)  | 373/1406 | 0.86 (0.70–1.04) | 0.85 (0.70–1.03) |
| Medicinal Plants      |           |                  |          | $p = 0.114$      | $p = 0.106$      |
| Eat Medicinal         | 55/116    | 0.40 (0.24–0.67) | 10/101   | 0.58 (0.23–1.45) | 1.26 (0.12–13.3) |
| Plants                |           | $p = 0.001$      |          | $p = 0.246$      | $p = 0.847$      |
| Longitudinal Analyses |           |                  |          |                  |                  |
| Total Sample          | 567/1752  | 1.0 (reference)  | 154/817  | 0.89 (0.64–1.24) |                  |
|                       |           |                  |          | $p = 0.501$      |                  |
| Don't Eat Fruits      | 371/1088  | 1.0 (reference)  | 95/406   | 0.92 (0.62–1.38) | 0.99 (0.65–1.49) |
|                       |           |                  |          | $p = 0.696$      | $p = 0.945$      |
| Eat Fruits            | 196/664   | 0.64 (0.45–0.91) | 59/411   | 0.54 (0.32–0.92) | 0.67 (0.36–1.23) |
|                       |           | $p = 0.014$      |          | $p = 0.023$      | $p = 0.194$      |
| Don't Eat             | 51/156    | 1.0 (reference)  | 12/54    | 1.01 (0.32–3.15) | -                |
| Vegetables            |           |                  |          | $p = 0.987$      |                  |
| Eat Vegetables        | 516/1596  | 1.47 (0.85–2.54) | 142/763  | 1.30 (0.71–2.39) | 0.87 (0.62–1.23) |
|                       |           | $p = 0.167$      |          | $p = 0.397$      | $p = 0.432$      |
| Don't Drink Tea       | 402/1158  | 1.0 (reference)  | 116/550  | 0.91 (0.61–1.34) | 0.86 (0.57–1.31) |

|                                            |          |                                      |         |                                                          |                                                          |
|--------------------------------------------|----------|--------------------------------------|---------|----------------------------------------------------------|----------------------------------------------------------|
| Drink Tea                                  | 165/594  | 0.97 (0.69–1.37)<br><i>p</i> = 0.859 | 38/267  | <i>p</i> = 0.617<br>0.84 (0.49–1.45)<br><i>p</i> = 0.531 | <i>p</i> = 0.489<br>0.91 (0.48–1.74)<br><i>p</i> = 0.779 |
| Don't Eat Meat                             | 185/647  | 1.0 (reference)                      | 36/246  | 0.90 (0.51–1.60)<br><i>p</i> = 0.719                     | 0.72 (0.36–1.49)<br><i>p</i> = 0.355                     |
| Eat Meat                                   | 382/1105 | 1.34 (0.94–1.92)<br><i>p</i> = 0.104 | 118/571 | 1.19 (0.76–1.88)<br><i>p</i> = 0.444                     | 0.90 (0.60–1.35)<br><i>p</i> = 0.614                     |
| Don't Eat Fish                             | 372/1122 | 1.0 (reference)                      | 85/461  | 0.76 (0.51–1.14)<br><i>p</i> = 0.187                     | 0.82 (0.53–1.27)<br><i>p</i> = 0.375                     |
| Eat Fish                                   | 195/630  | 0.80 (0.56–1.15)<br><i>p</i> = 0.235 | 69/356  | 0.96 (0.58–1.61)<br><i>p</i> = 0.881                     | 0.94 (0.52–1.72)<br><i>p</i> = 0.851                     |
| Don't Eat Eggs                             | 191/596  | 1.0 (reference)                      | 53/233  | 0.85 (0.48–1.49)<br><i>p</i> = 0.559                     | 1.24 (0.65–2.38)<br><i>p</i> = 0.511                     |
| Eat Eggs                                   | 376/1156 | 0.78 (0.55–1.12)<br><i>p</i> = 0.179 | 101/584 | 0.72 (0.45–1.14)<br><i>p</i> = 0.160                     | 0.94 (0.62–1.42)<br><i>p</i> = 0.767                     |
| Don't Eat Food<br>Made from Beans          | 252/844  | 1.0 (reference)                      | 61/322  | 0.91 (0.55–1.49)<br><i>p</i> = 0.696                     | 0.95 (0.55–1.63)<br><i>p</i> = 0.840                     |
| Eat Food Made<br>from Beans                | 315/907  | 1.50 (1.07–2.09)<br><i>p</i> = 0.018 | 93/495  | 1.32 (0.84–2.10)<br><i>p</i> = 0.230                     | 0.86 (0.55–1.35)<br><i>p</i> = 0.514                     |
| Don't Eat Salt-<br>preserved<br>Vegetables | 365/1019 | 1.0 (reference)                      | 93/476  | 0.86 (0.57–1.30)<br><i>p</i> = 0.476                     | 0.82 (0.53–1.26)<br><i>p</i> = 0.358                     |
| Eat Salt-preserved<br>Vegetables           | 202/732  | 1.03 (0.74–1.45)<br><i>p</i> = 0.842 | 61/341  | 0.98 (0.59–1.61)<br><i>p</i> = 0.934                     | 0.94 (0.53–1.65)<br><i>p</i> = 0.820                     |
| Don't Eat Sugar                            | 357/1203 | 1.0 (reference)                      | 86/521  | 0.85 (0.56–1.31)<br><i>p</i> = 0.472                     | 0.85 (0.54–1.34)<br><i>p</i> = 0.478                     |
| Eat Sugar                                  | 210/549  | 1.39 (1.00–1.93)<br><i>p</i> = 0.052 | 68/296  | 1.31 (0.82–2.11)<br><i>p</i> = 0.260                     | 1.01 (0.59–1.72)<br><i>p</i> = 0.972                     |
| Don't Eat Garlic                           | 348/1049 | 1.0 (reference)                      | 83/415  | 1.14 (0.73–1.77)<br><i>p</i> = 0.565                     | 1.18 (0.73–1.90)<br><i>p</i> = 0.492                     |
| Eat Garlic                                 | 219/703  | 1.45 (1.04–2.02)<br><i>p</i> = 0.027 | 71/402  | 1.00 (0.63–1.59)<br><i>p</i> = 0.991                     | 0.72 (0.43–1.20)<br><i>p</i> = 0.206                     |
| Don't Eat Milk<br>Products                 | 451/1367 | 1.0 (reference)                      | 107/502 | 0.83 (0.57–1.23)<br><i>p</i> = 0.358                     | 0.85 (0.57–1.27)<br><i>p</i> = 0.439                     |
| Eat Milk Products                          | 116/385  | 0.54 (0.36–0.83)<br><i>p</i> = 0.005 | 47/315  | 0.58 (0.33–0.99)<br><i>p</i> = 0.047                     | 0.72 (0.32–1.58)<br><i>p</i> = 0.408                     |
| Don't Eat Nut<br>Products                  | 521/1570 | 1.0 (reference)                      | 141/659 | 0.89 (0.63–1.25)<br><i>p</i> = 0.497                     | 0.86 (0.60–1.22)<br><i>p</i> = 0.385                     |
| Eat Nut Products                           | 46/182   | 1.01 (0.54–1.87)<br><i>p</i> = 0.987 | 13/158  | 0.95 (0.43–2.11)<br><i>p</i> = 0.902                     | -                                                        |
| Don't Eat<br>Mushroom or<br>Algae          | 530/1588 | 1.0 (reference)                      | 137/636 | 0.93 (0.66–1.31)<br><i>p</i> = 0.682                     | 0.94 (0.67–1.33)<br><i>p</i> = 0.741                     |
| Eat Mushroom or                            | 37/164   | 0.67 (0.35–1.28)                     | 17/180  | 0.40 (0.16–1.00)                                         | -                                                        |

|                  |          |                  |         |                  |                  |
|------------------|----------|------------------|---------|------------------|------------------|
| Algae            |          | $p = 0.224$      |         | $p = 0.051$      |                  |
| Don't Eat        | 525/1618 | 1.0 (reference)  | 137/679 | 0.89 (0.63–1.25) | 0.89 (0.63–1.27) |
| Vitamins         |          |                  |         | $p = 0.489$      | $p = 0.533$      |
| Eat Vitamins     | 42/134   | 0.89 (0.48–1.65) | 17/138  | 0.86 (0.38–1.95) | -                |
|                  |          | $p = 0.711$      |         | $p = 0.713$      |                  |
| Don't Eat        | 555/1715 | 1.0 (reference)  | 148/764 | 0.89 (0.64–1.25) | 0.90 (0.64–1.26) |
| Medicinal Plants |          |                  |         | $p = 0.507$      | $p = 0.530$      |
| Eat Medicinal    | 12/37    | 1.49 (0.51–4.34) | 6/53    | 1.35 (0.40–4.53) | -                |
| Plants           |          | $p = 0.461$      |         | $p = 0.623$      |                  |
